# Supplementary material
Source: PubMed Central journal article supplement (PMC2798817)
Supplement: NIHMS151481-supplement-1_si_001.pdf [file NIHMS151481-supplement-1_si_001.pdf]

# One-Pot Shotgun Quantitative Mass Spectrometry Characterization of Histones

Mariana D. Plazas-Mayorca,<sup>1</sup> Barry M. Zee,<sup>2</sup> Nicolas L. Young,<sup>2</sup> Ian M. Fingerman,<sup>3</sup>

Gary LeRoy,<sup>2</sup> Scott D. Briggs,<sup>3</sup> and Benjamin A. Garcia.<sup>1,2\*</sup>

<sup>1</sup>Department of Chemistry and <sup>2</sup>Department of Molecular Biology

Princeton University, Princeton NJ 08544 and

<sup>3</sup>Department of Biochemistry and Purdue Cancer Center,

Purdue University, West Lafayette, Indiana 47907

\*To whom correspondence should be addressed,

[bagarcia@princeton.edu](mailto:bagarcia@princeton.edu), 1-609-258-8854

**Supplemental Table 1.** Summary of H2A/H2B variants detected through analysis of the HPLC

purified proteins and one-pot analyses of unfractionated bulk histones acid extracted from HeLa cells.

| Histone Variants                       | Accession Number | H2A HPLC purified | H2B HPLC purified | One-pot Shotgun (CAD-MS/MS) | One-pot Shotgun Decision-tree (CAD/ETD) |
|----------------------------------------|------------------|-------------------|-------------------|-----------------------------|-----------------------------------------|
| <b>Histone H2A</b>                     |                  |                   |                   |                             |                                         |
| H2AM_HUMAN Histone H2A.m (H2A/m)       | 121986           | +                 | +                 | +                           | +                                       |
| histone H2a                            | 15617199         | +                 | +                 | +                           | +                                       |
| histone H2A                            | 25092737         | +                 |                   | +                           | +                                       |
| H2A histone family, member C           | 4504239          | +                 |                   | +                           | +                                       |
| H2A histone family, member O           | 4504251          | +                 | +                 | +                           | +                                       |
| H2A histone family, member Y isoform 2 | 93141020         | +                 | +                 | +                           | +                                       |
| Core histone macroH2A2.2               | 8923920          | +                 | +                 |                             |                                         |
| H2A histone family, member Z           | 4504255          | +                 | +                 | +                           | +                                       |
| H2A histone family, member V isoform 4 | 41406069         | +                 | +                 |                             |                                         |
| H2A histone family, member V isoform 5 | 41406071         | +                 |                   |                             |                                         |
| H2AFX                                  | 48146275         | +                 |                   | +                           | +                                       |
| histone H2A/r                          | 49659927         | +                 |                   | +                           | +                                       |
| Histone H2a                            | 12654707         |                   |                   | +                           | +                                       |
| H2A histone family, member J isoform 1 | 8922758          |                   |                   | +                           | +                                       |
| histone H2A                            | 28195394         |                   |                   | +                           | +                                       |
| <b>Histone H2B</b>                     |                  |                   |                   |                             |                                         |
| H2B histone family, member B           | 20336752         |                   | +                 | +                           | +                                       |
| H2B histone family, member C           | 4504259          | +                 | +                 | +                           | +                                       |
| H2B histone family, member R           | 20336754         |                   | +                 | +                           | +                                       |
| H2B histone family, member E           | 4504263          |                   | +                 | +                           | +                                       |
| HIST1H2BA protein                      | 42542679         |                   | +                 | +                           | +                                       |

Plazas-Mayorca et al. Supplemental Table 1

**Supplemental Table 2.** Summary of abundant post-translational modifications detected on histone H3 through analysis of HPLC purified histone H3.2 protein and one-pot analyses of bulk histones coupled

to nanoLC-MS/MS.

| Histone H3 peptides   | H3 HPLC purified | One-pot Shotgun (CID-MS/MS) | One-pot Shotgun Decision-tree (CID/ETD) |
|-----------------------|------------------|-----------------------------|-----------------------------------------|
| <b>TKQ TAR</b>        |                  |                             |                                         |
| Unmod                 | +                | +                           | +                                       |
| K4me1                 | +                | +                           | +                                       |
| K4me2                 | +                | +                           | +                                       |
| K4me3                 | +                | -                           | -                                       |
| K4ac                  | +                | +                           | +                                       |
| <b>KSTGGKAPR</b>      |                  |                             |                                         |
| Unmod                 | +                | +                           | +                                       |
| K9me1                 | +                | +                           | +                                       |
| K9me2                 | +                | +                           | +                                       |
| K9me3                 | +                | +                           | +                                       |
| K9ac                  | +                | +                           | +                                       |
| K14ac                 | +                | +                           | +                                       |
| K9me1 K14ac           | +                | +                           | +                                       |
| K9me2 K14ac           | +                | +                           | +                                       |
| K9me3 K14ac           | +                | +                           | +                                       |
| K9acK14ac             | +                | +                           | +                                       |
| <b>KQLATKAAR</b>      |                  |                             |                                         |
| Unmod                 | +                | +                           | +                                       |
| K18me1                | +                | +                           | +                                       |
| K23me1                | +                | +                           | +                                       |
| K18ac                 | +                | +                           | +                                       |
| K23ac                 | +                | +                           | +                                       |
| K18acK23ac            | +                | +                           | +                                       |
| <b>KSAPATGGVKKPHR</b> |                  |                             |                                         |
| Unmod                 | +                | +                           | +                                       |
| K27me1                | +                | +                           | +                                       |
| K27me2                | +                | +                           | +                                       |
| K27me3                | +                | +                           | +                                       |
| K27ac                 | +                | +                           | +                                       |
| K36me1                | +                | +                           | +                                       |
| K36me2                | +                | +                           | +                                       |
| K36me3                | +                | +                           | +                                       |
| K27me1K36me1          | +                | +                           | +                                       |
| K27me1K36me2          | +                | +                           | +                                       |
| K27me1K36me3          | +                | +                           | -                                       |
| K27me2K36me1          | +                | +                           | +                                       |
| K27me2K36me2          | +                | +                           | -                                       |
| K27me2K36me3          | +                | -                           | -                                       |
| K27me3K36me1          | +                | +                           | +                                       |
| K27me3K36me2          | +                | +                           | +                                       |
| K27me3K36me3          | -                | -                           | -                                       |
| <b>YQKSTELLIR</b>     |                  |                             |                                         |
| Unmod                 | +                | +                           | +                                       |
| K56me1                | +                | +                           | +                                       |
| K56ac                 | +                | +                           | +                                       |
| <b>KLPFQR</b>         |                  |                             |                                         |
| Unmod                 | +                | +                           | +                                       |
| K65me1                | +                | +                           | +                                       |
| <b>EIAQDFKTDLR</b>    |                  |                             |                                         |
| Unmod                 | +                | +                           | +                                       |
| K79me1                | +                | +                           | +                                       |
| K79me2                | +                | +                           | +                                       |
| K79ac                 | +                | +                           | +                                       |

Plazas-Mayorca et al. Supplemental Table 2
